# Supplementary material for: Synthesis, self-assembly and photovoltaic applications of tribenzopentaphene derivatives
Source: Royal Society of Chemistry journal article supplement (doi:10.1039/c3ra43392g), 2013-01-01
Supplement: c3ra43392g.pdf [file c3ra43392g.pdf]

Electronic Supplementary Information (ESI) for *RSC Advances*

This journal is © the Royal Society of Chemistry 2013

Electronic Supplementary Information (ESI)

**Synthesis, self-assembly and photovoltaic  
applications of tribenzopentaphene derivatives**

Ching-En Chou, Yong Li, Yanke Che, Ling Zang and Zhonghua Peng\*

[pengz@umkc.edu](mailto:pengz@umkc.edu)

## Table of contents

|                                                                                 | <b>Page</b>  |
|---------------------------------------------------------------------------------|--------------|
| 1. $^1\text{H}$ and $^{13}\text{C}$ NMR spectra of compounds <b>1a~1d</b> ..... | <b>S2-6</b>  |
| 2. 2D COSY $^1\text{H}$ NMR spectra of compounds <b>1a~1d</b> .....             | <b>S7-8</b>  |
| 3. DSC thermograms of <b>1a~1c</b> .....                                        | <b>S9-10</b> |
| 4. POM images of <b>1a~1c</b> during cooling from melt.....                     | <b>S10</b>   |
| 5. SEM images of self-assembled objects of <b>1a~1d</b> .....                   | <b>S11</b>   |
| 6. Solar cell configuration . .....                                             | <b>S12</b>   |

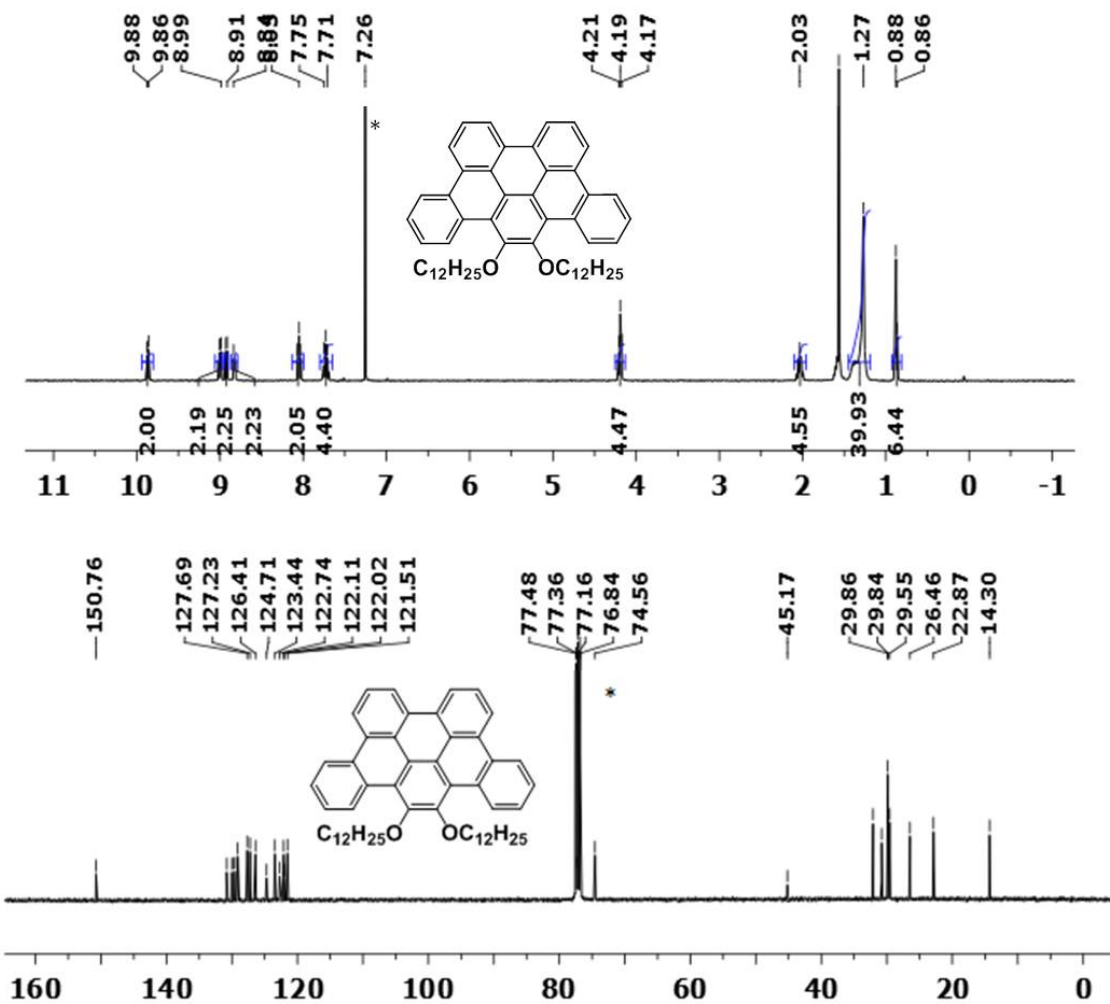

**Figure S1:** <sup>1</sup>H (top) and <sup>13</sup>C (bottom) NMR (CDCl<sub>3</sub>, 298K) spectra of **1a** (\*solvent).

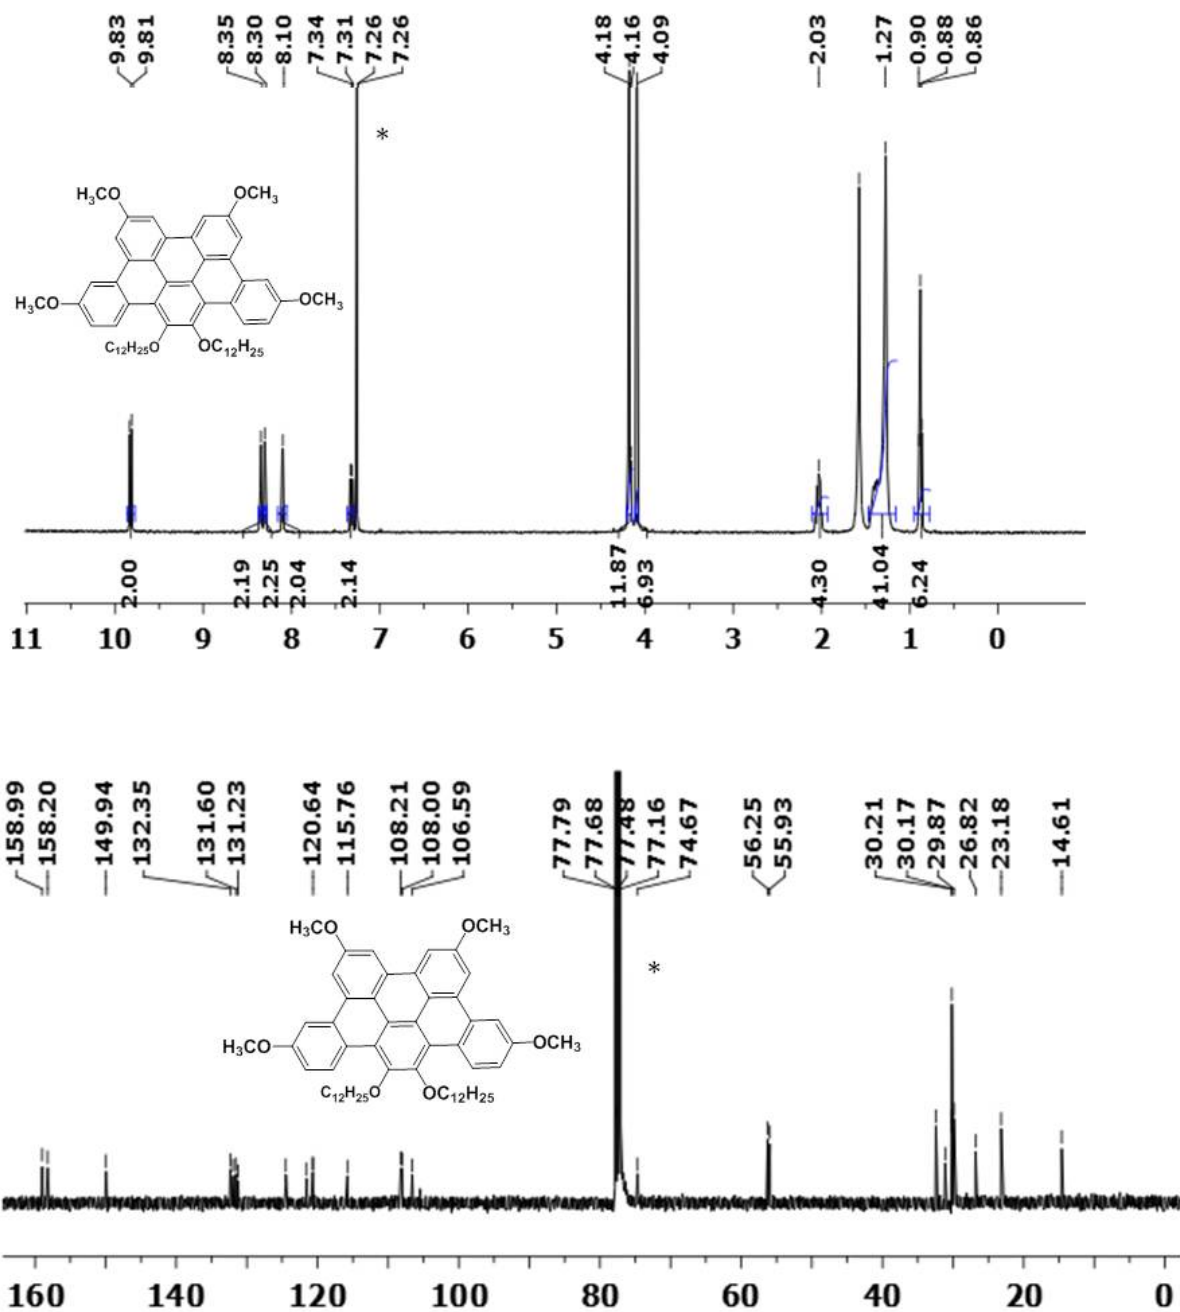

Figure S2:  $^1\text{H}$  (top) and  $^{13}\text{C}$  (bottom) NMR ( $\text{CDCl}_3$ , 298K) spectra of **1b** (\*solvent).

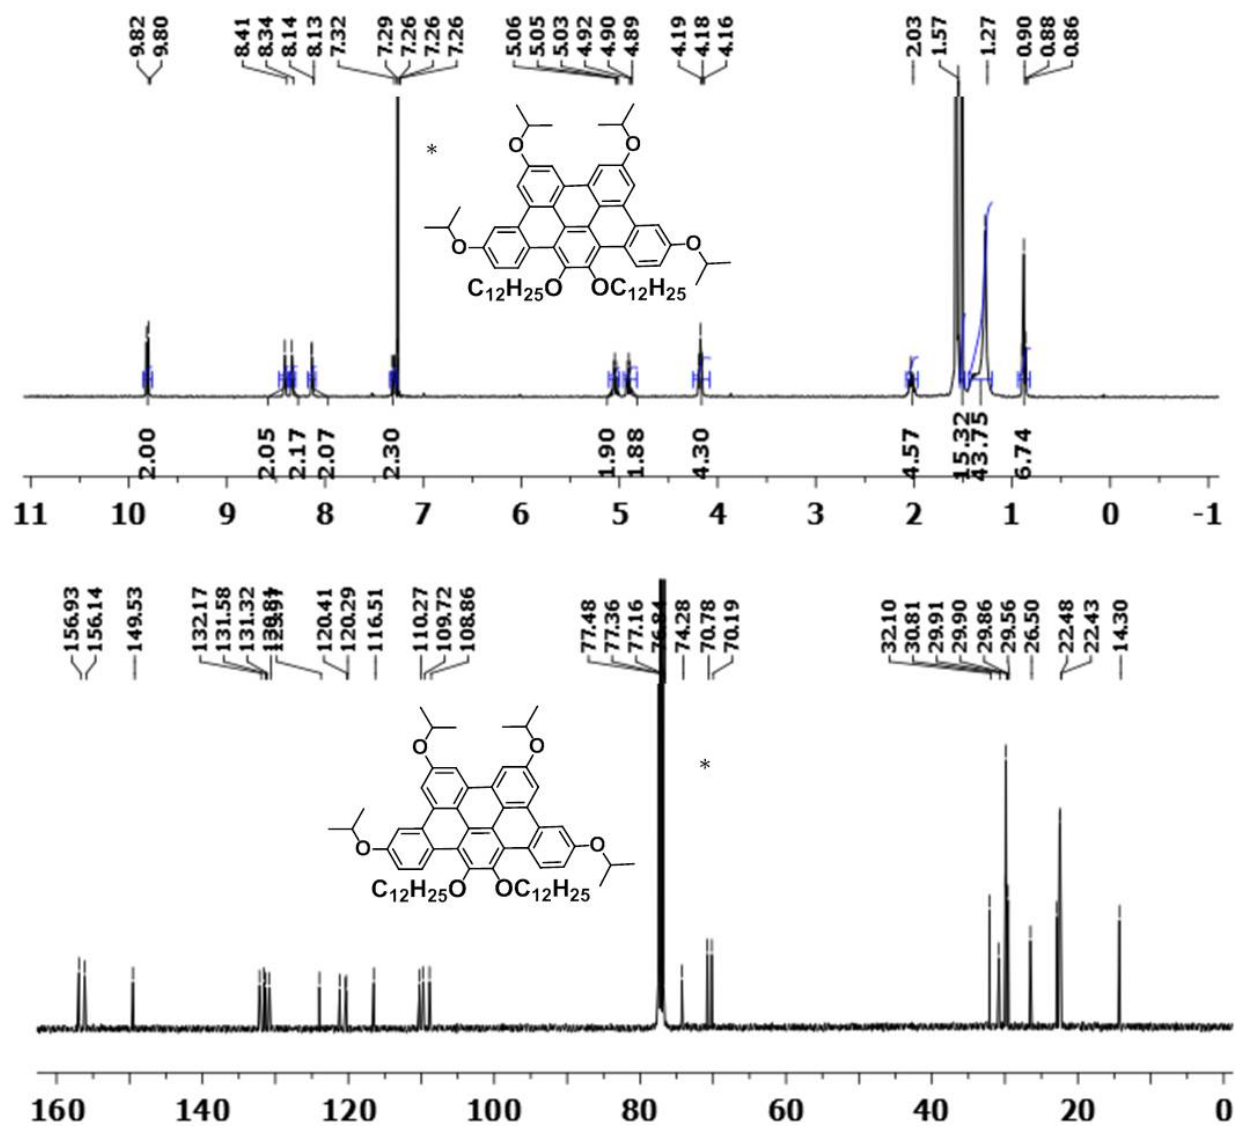

**Figure S3:** <sup>1</sup>H (top) and <sup>13</sup>C (bottom) NMR (CDCl<sub>3</sub>, 298K) spectra of **1c** (\*solvent).

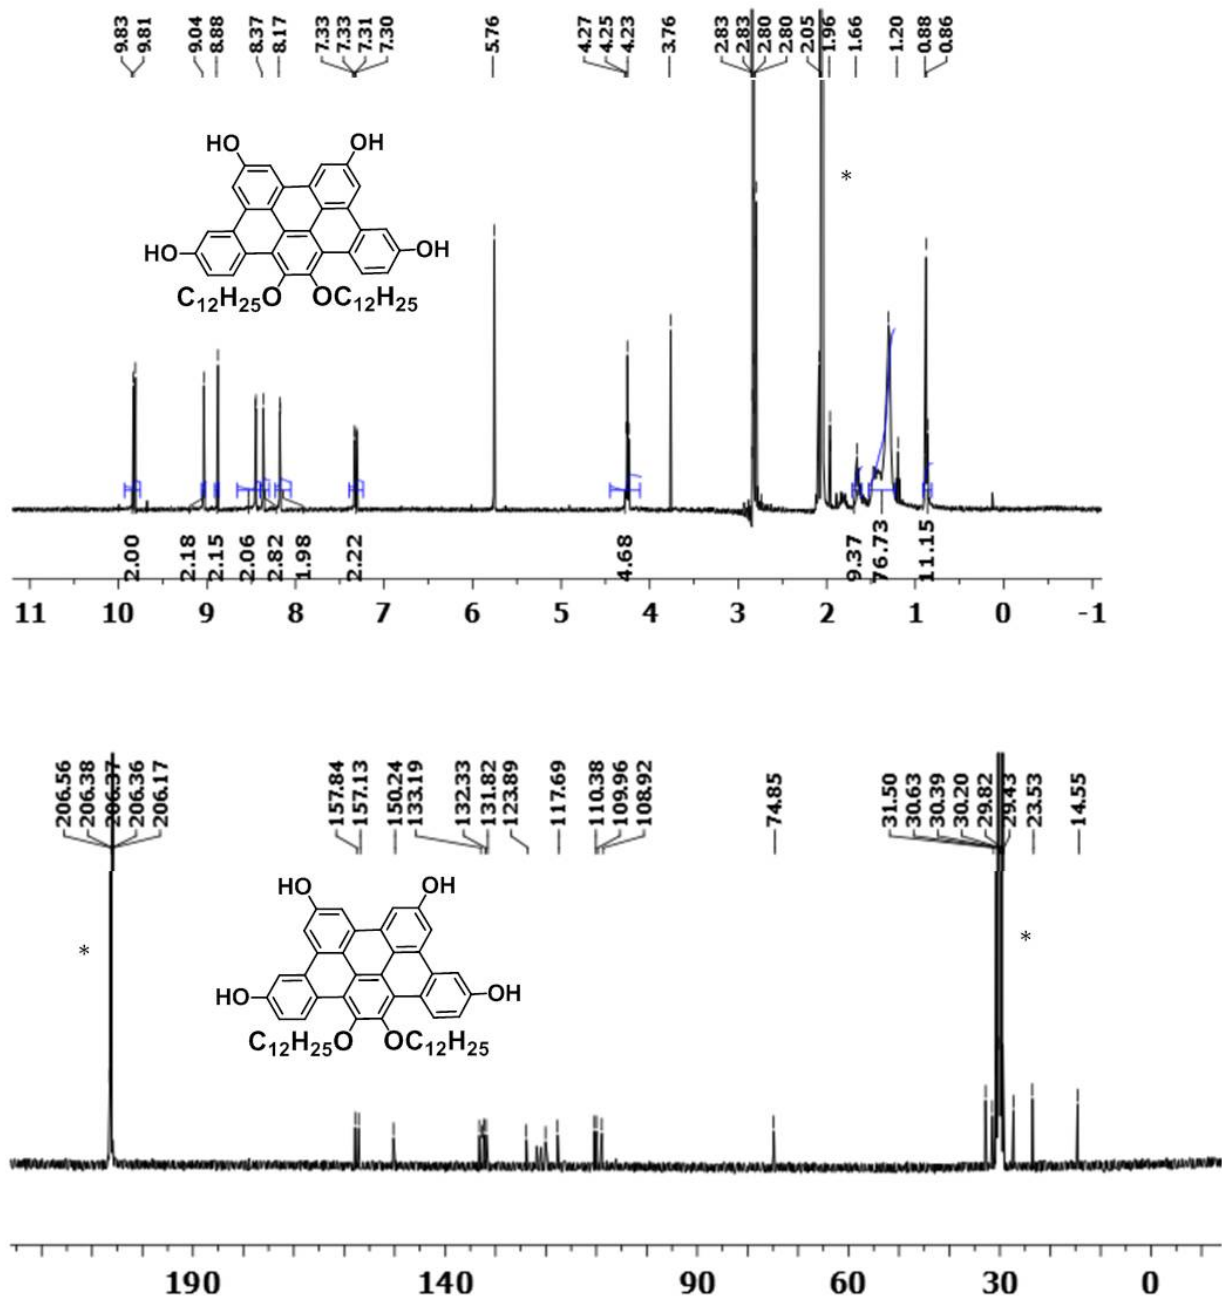

**Figure S4:** <sup>1</sup>H (top) and <sup>13</sup>C (bottom) NMR (Acetone-*d*<sub>6</sub>, 298K) spectra of **1d** (\*solvent).

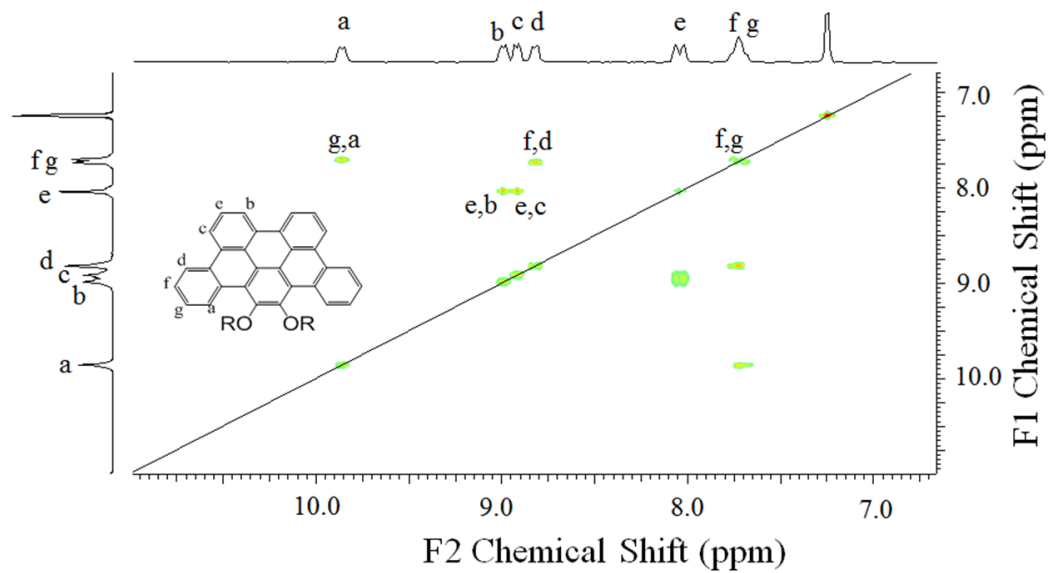

**Figure S5:** 2D COSY  $^1\text{H}$  NMR spectrum of **1a** in  $\text{CDCl}_3$ .

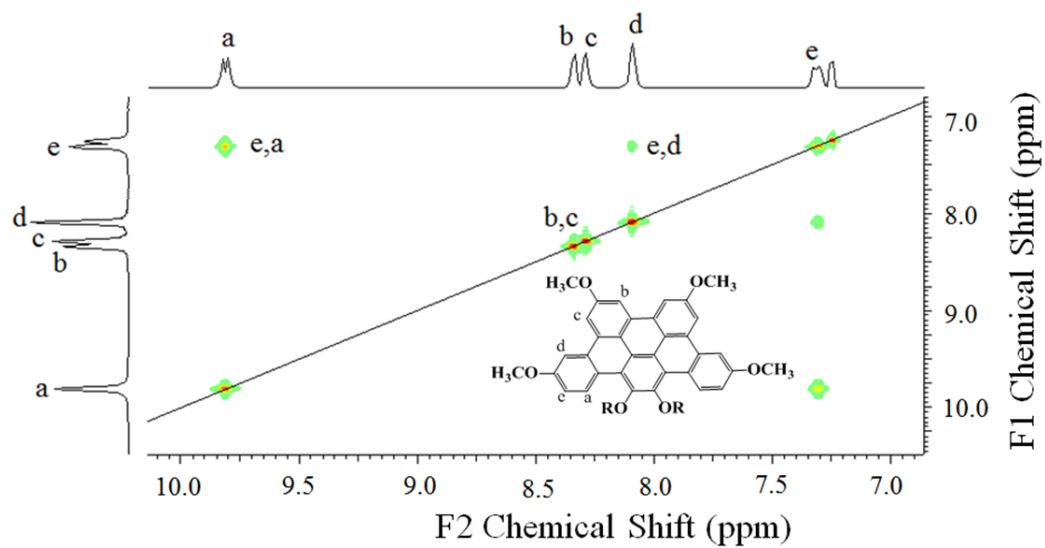

**Figure S6:** 2D COSY  $^1\text{H}$  NMR spectrum of **1b** in  $\text{CDCl}_3$ .

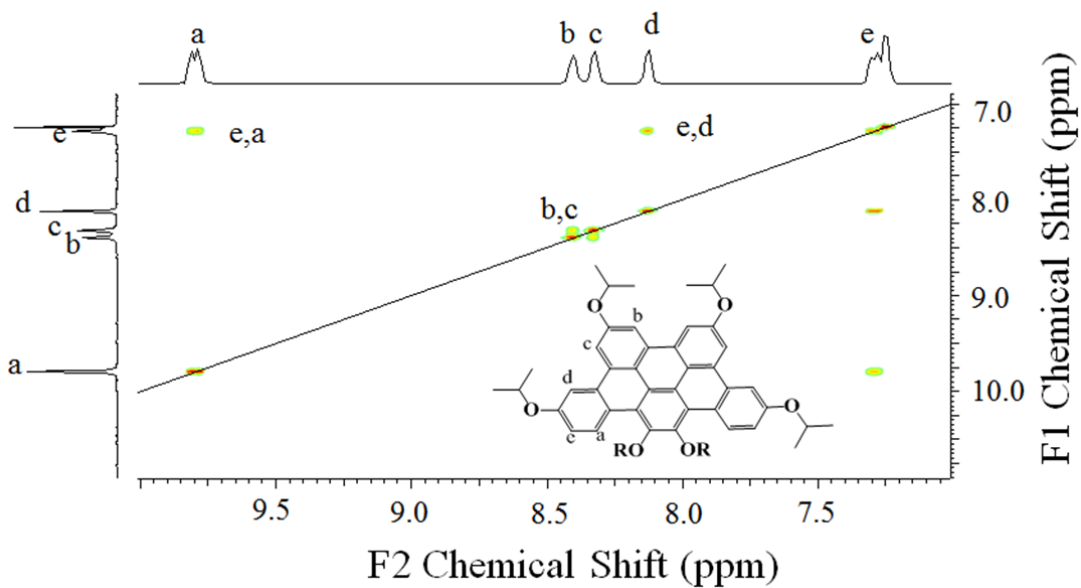

**Figure S7:** 2D COSY  $^1\text{H}$  NMR spectrum of **1c** in  $\text{CDCl}_3$ .

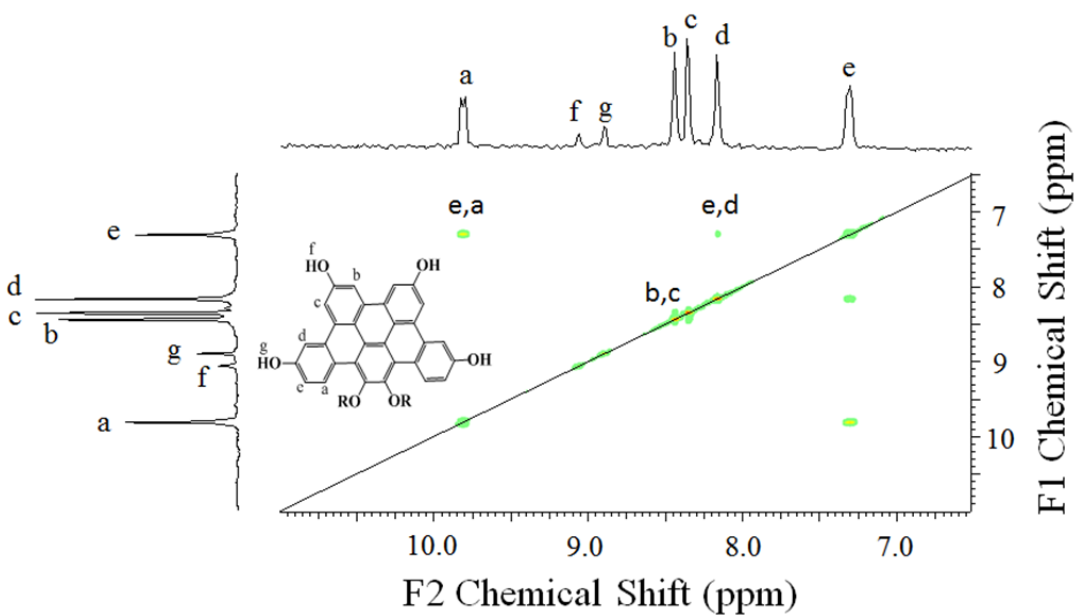

**Figure S8:** 2D COSY  $^1\text{H}$  NMR spectrum of **1d** in  $\text{CDCl}_3$ .



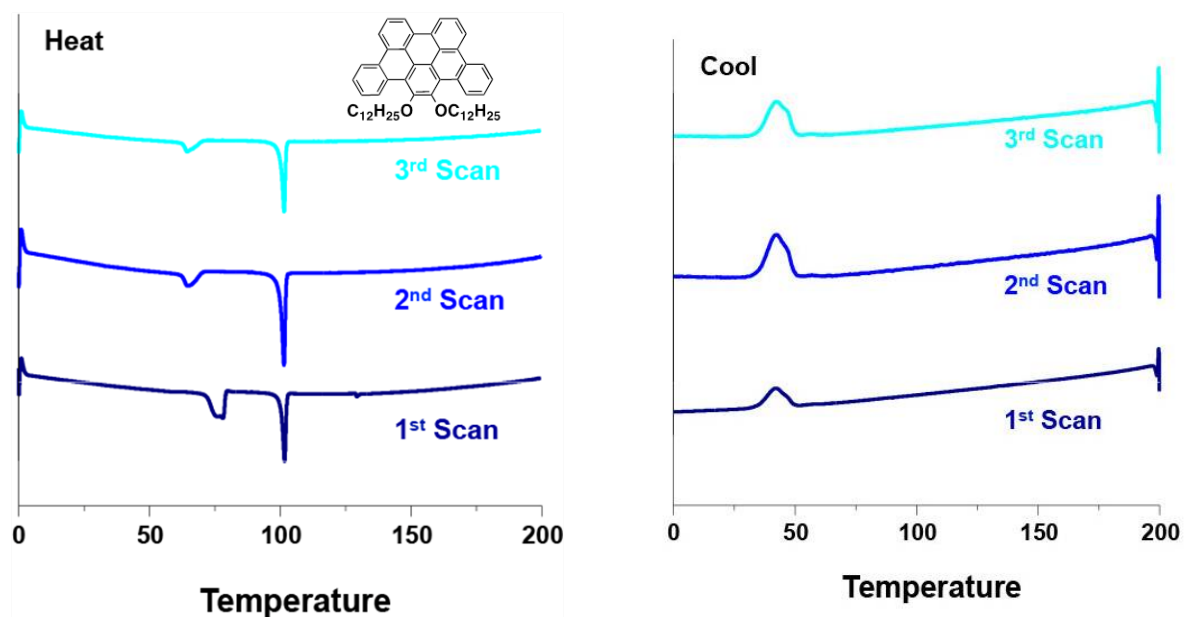

**Figure S9:** DSC thermograms for **1a** with a heating and cooling rate of 10 °C/min.

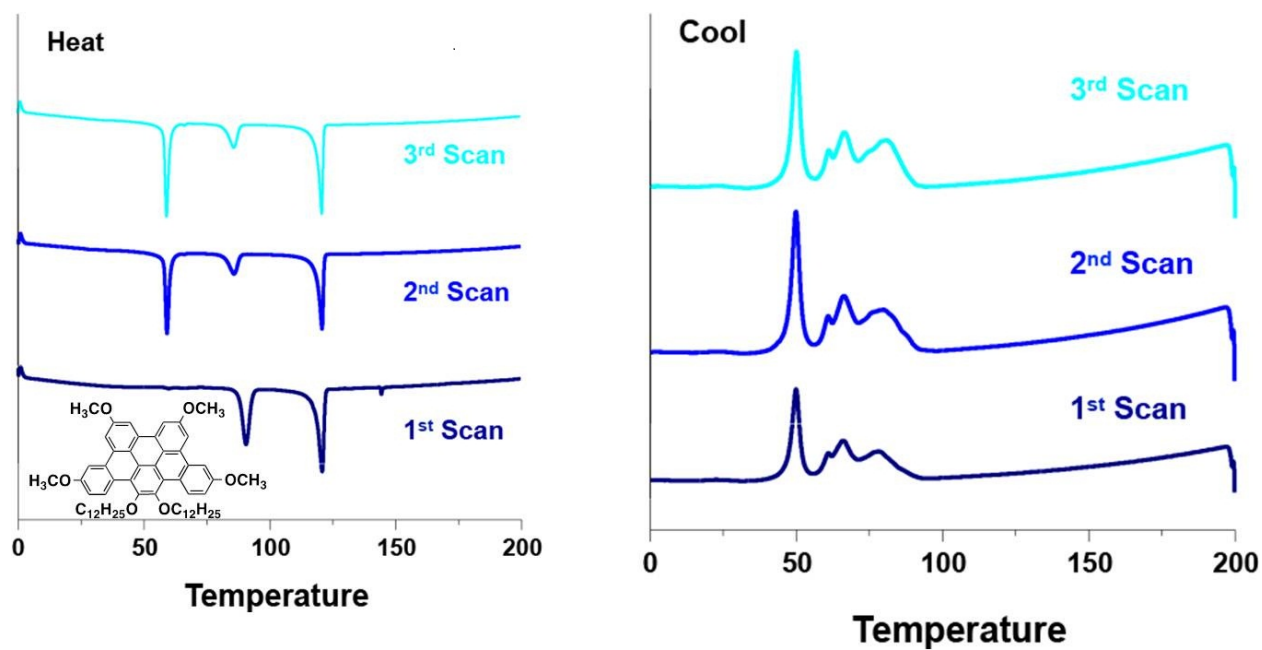

**Figure S10:** DSC thermograms for **1b** with a heating and cooling rate of 10 °C/min.

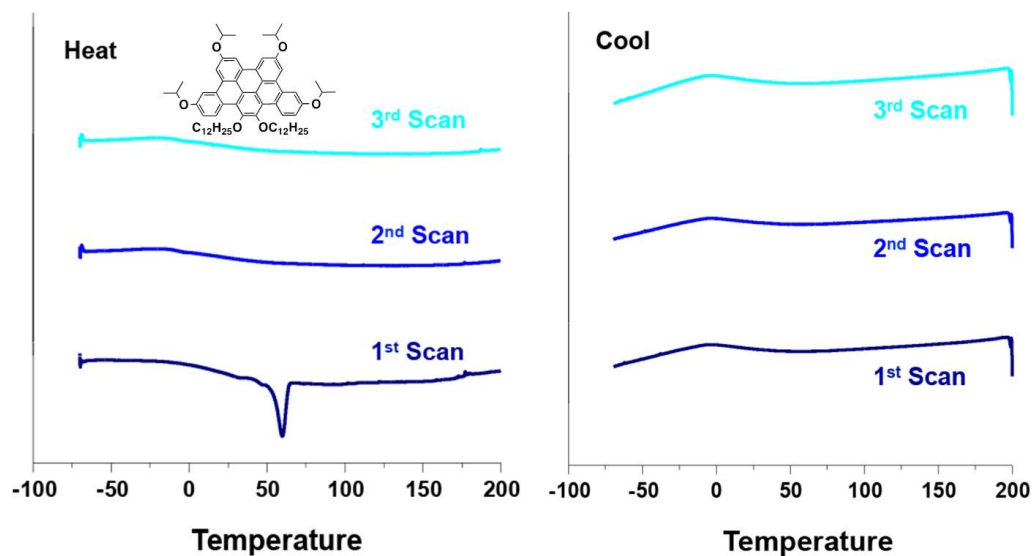

**Figure S11:** DSC thermograms for **1c** with a heating and cooling rate of 10 °C/min.

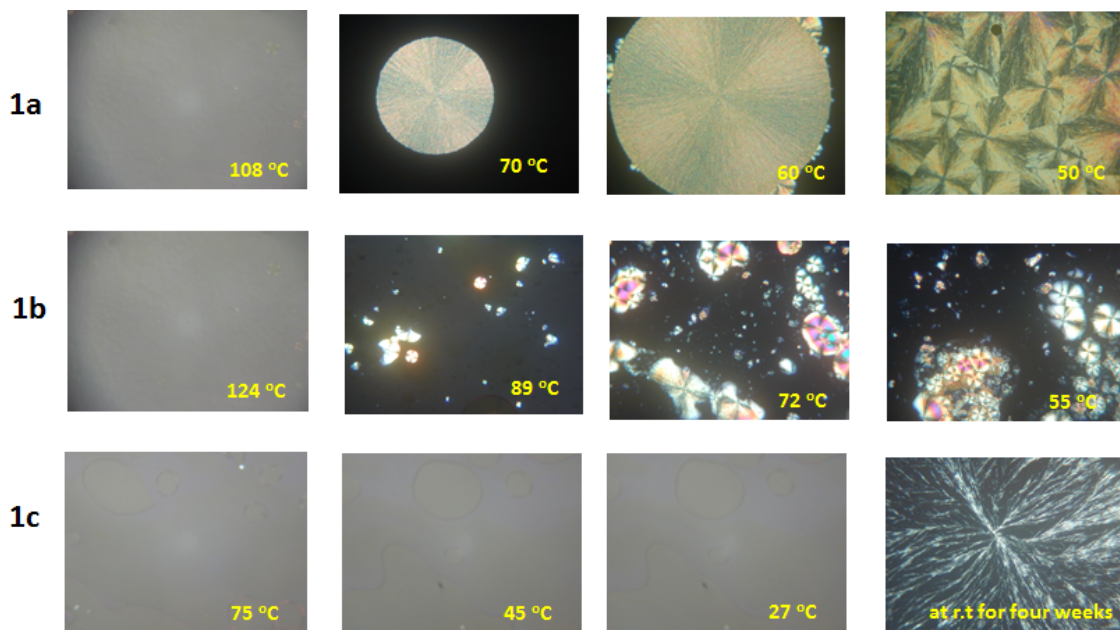

**Figure S12:** POM images of **1a**, **1b**, and **1c** during cooling from melt (1 °C/min).

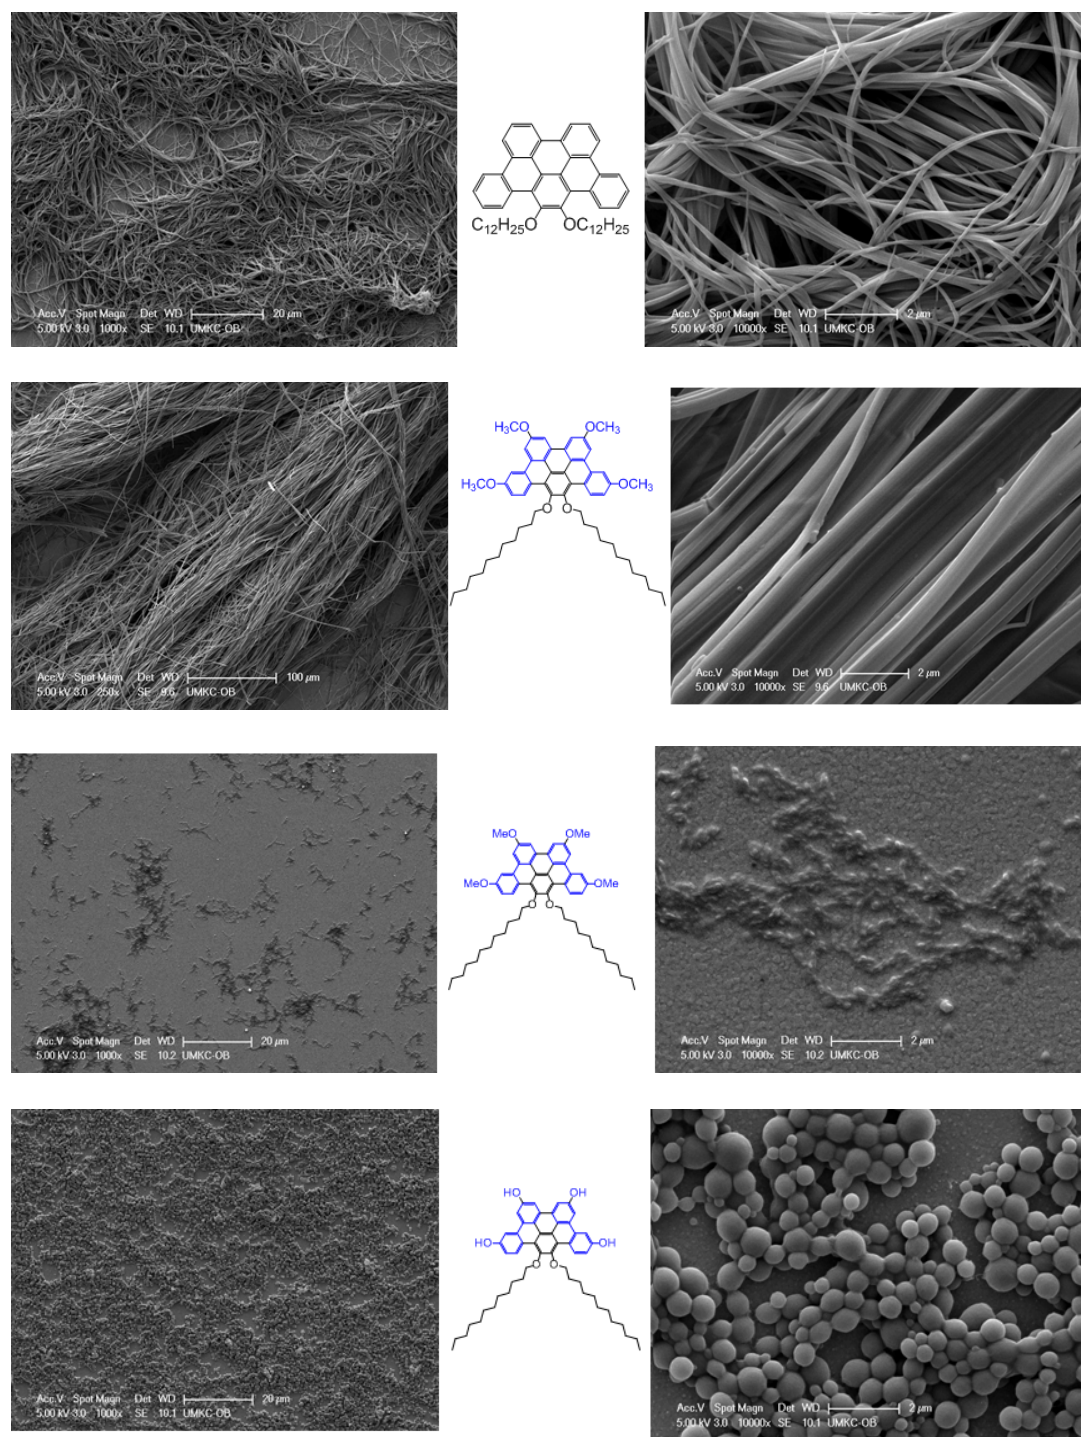

**Figure S13:** SEM images of self-assembled objects of **1a~1d**.

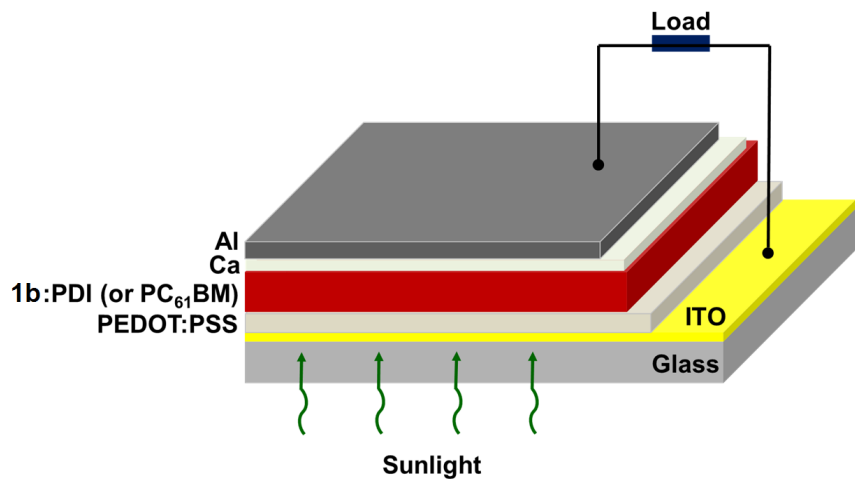

**Figure S14:** The solar cell device configuration of **1b** blended with PDI or PC<sub>61</sub>BM.
